# Supplementary material for: Bubble Wrap-Like Carbon-Coated Rattle-Type Silica@silicon Nanoparticles by Surface-Protected Etching as Hybrid Anodes for Lithium–Ion Batteries
Source: Preprints.org preprint supplement (doi:10.20944/preprints202311.1792.v1), 2023-11-28
Supplement: Supplementary file 1 [file supplementary]

**Supplementary Materials**

**Bubble wrap-like carbon-coated rattle-type silica@silicon nanoparticles by surface-protected etching as hybrid anodes for lithium-ion batteries**

Angelica Martino 1, Jiyun Jeon 2, Hyun-Ho Park 1, Hochun Lee 2, and
Chang-Seop Lee 1,*

1Department of Chemistry, Keimyung University, Daegu 42601, Korea

2Department of Energy Science and Engineering, DGIST, Daegu 42988, Korea

*Corresponding author: Chang-Seop Lee

Department of Chemistry, Keimyung University, Daegu 42601, Korea

Phone No: +82-53-580-5192; Fax No: +82-53-580-5056

E-mail: surfkm@kmu.ac.kr


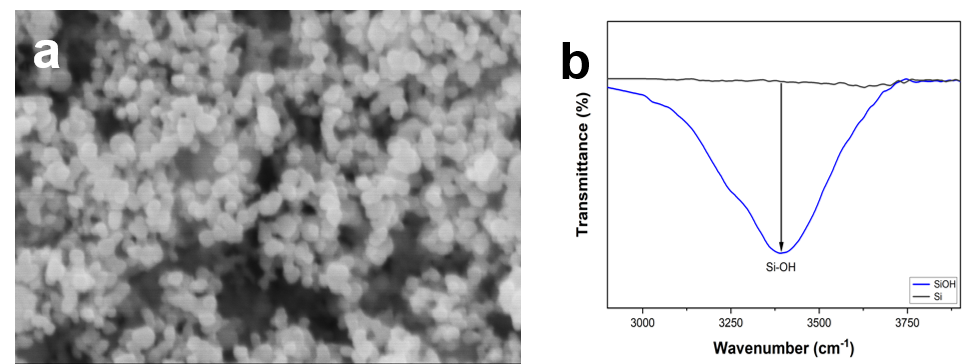


**Figure S1.** FE-SEM image of (a) pure Si nanoparticles. (b) FT-IR result comparing pure Si nanoparticles and Si-OH after piranha solution pre-treatment.


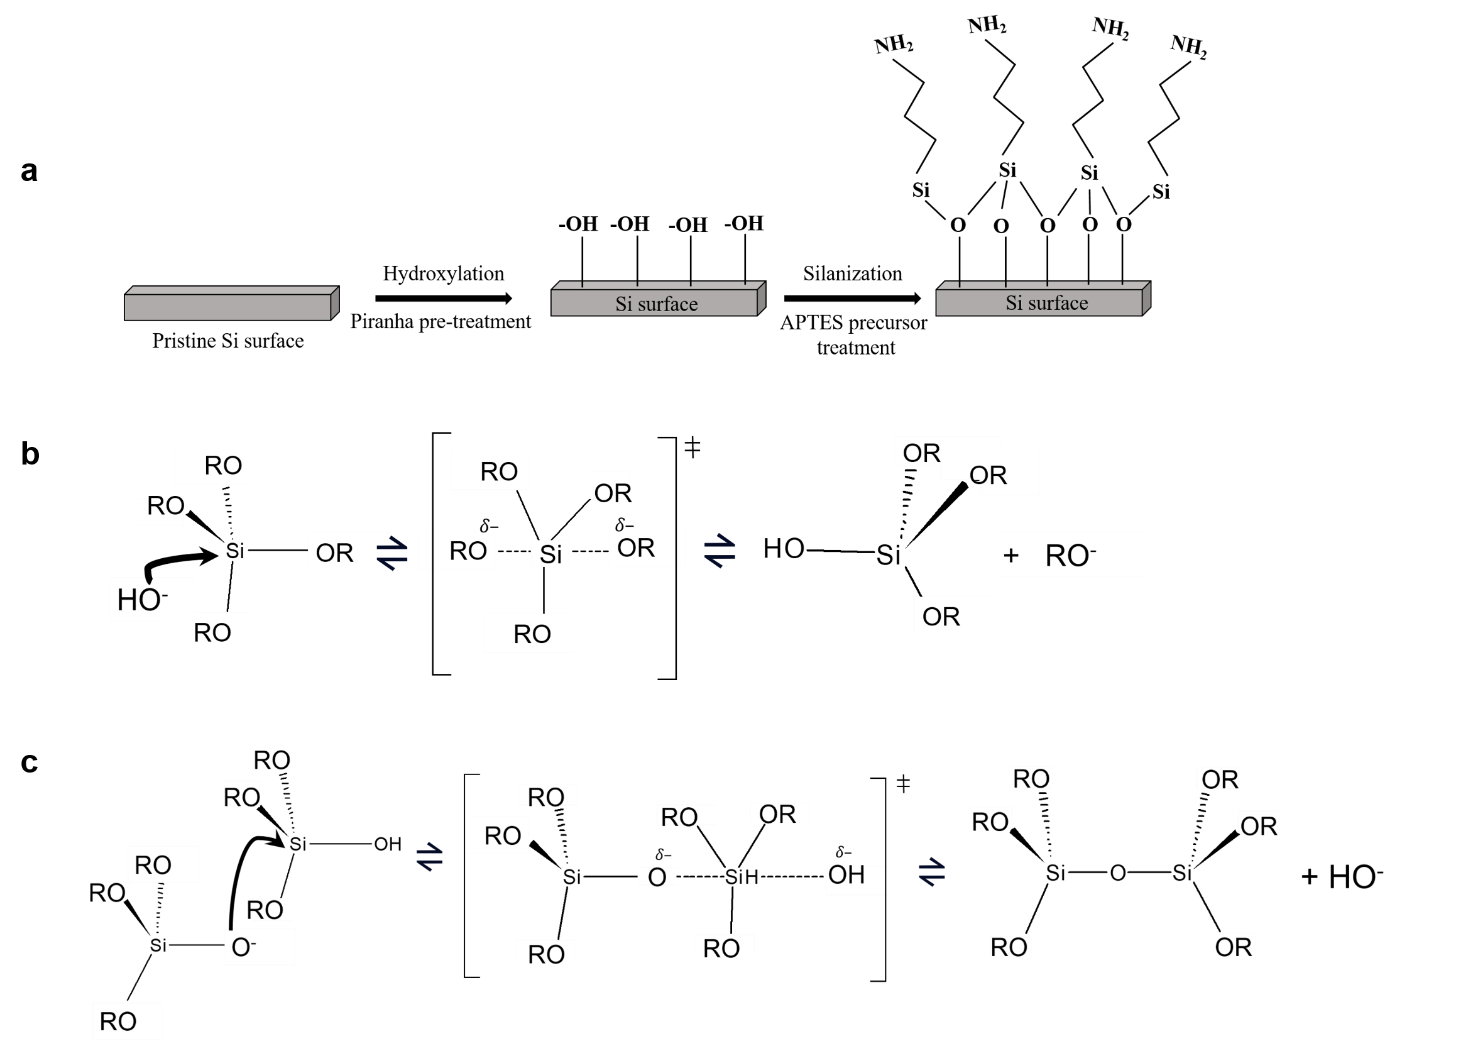


**Figure S2.** (a) Formation of siloxane networks from piranha-treated Si-OH using APTES. (b) Hydrolysis and (c) condensation reaction mechanism of TEOS showing formation of siloxane bridges.


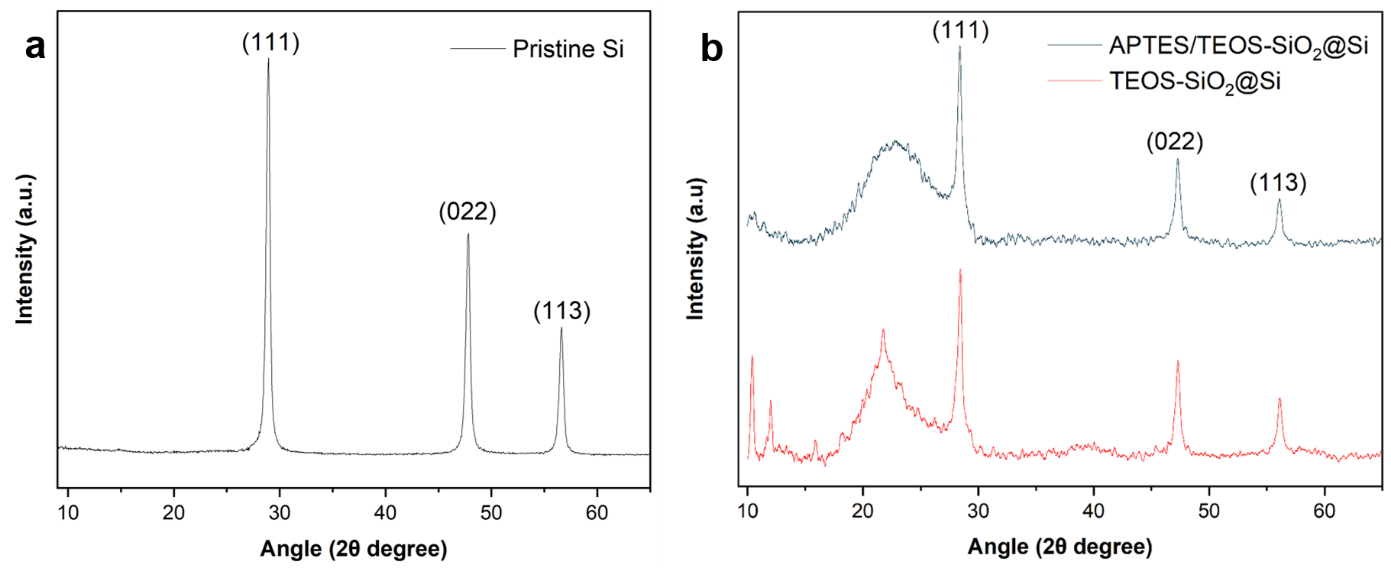


**Figure S3.** XRD patterns of (a) Si and (b) TEOS-derived SiO2@Si and APTES/TEOS-derived SiO2@Si.


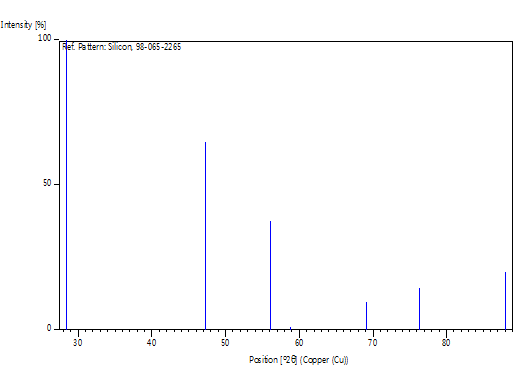


**Figure S4.** XRD reference peaks for face-centered cubic Si crystal (Reference code 98-065-2265)

**Peak list**

| No. | h | k | l | d [Å] | 2Theta[deg] | I [%] |
| --- | --- | --- | --- | --- | --- | --- |
| 1 | 1 | 1 | 1 | 3.13559 | 28.442 | 100.0 |
| 2 | 0 | 2 | 2 | 1.92015 | 47.302 | 65.0 |
| 3 | 1 | 1 | 3 | 1.63751 | 56.122 | 37.8 |
| 4 | 2 | 2 | 2 | 1.56779 | 58.856 | 0.0 |
| 5 | 0 | 0 | 4 | 1.35775 | 69.129 | 9.8 |
| 6 | 1 | 3 | 3 | 1.24596 | 76.375 | 14.4 |
| 7 | 2 | 2 | 4 | 1.10860 | 88.029 | 19.9 |


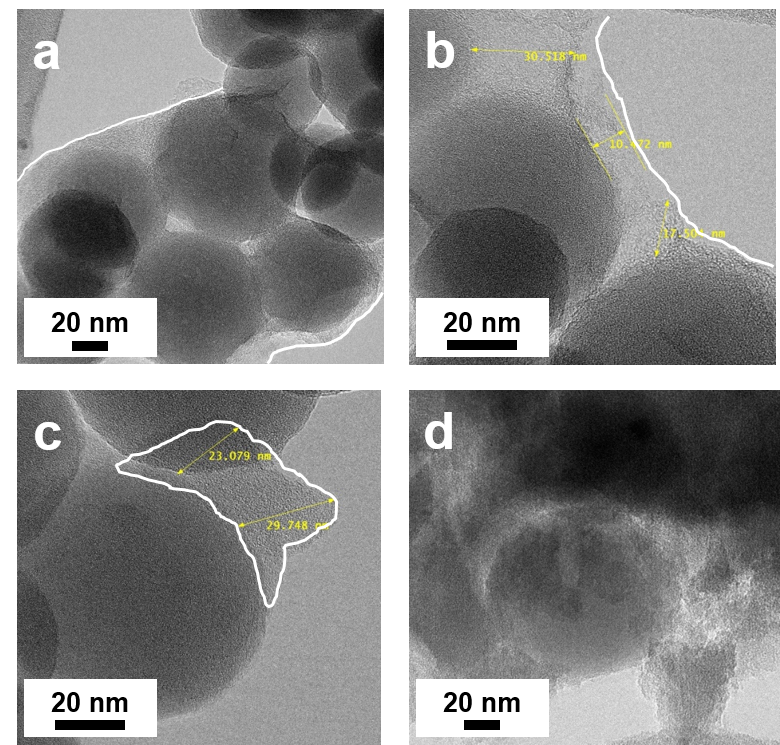


**Figure S5.** TEM images showing carbon crosslinking from PEI and PDA carbon coating efficiency in (a, b) composite samples prepared via traditional SiO2 sol-gel synthesis reaction and carbon coating at room temperature and (c, d) composite samples prepared via hydrothermal treatment at 140 ºC for 24 h.


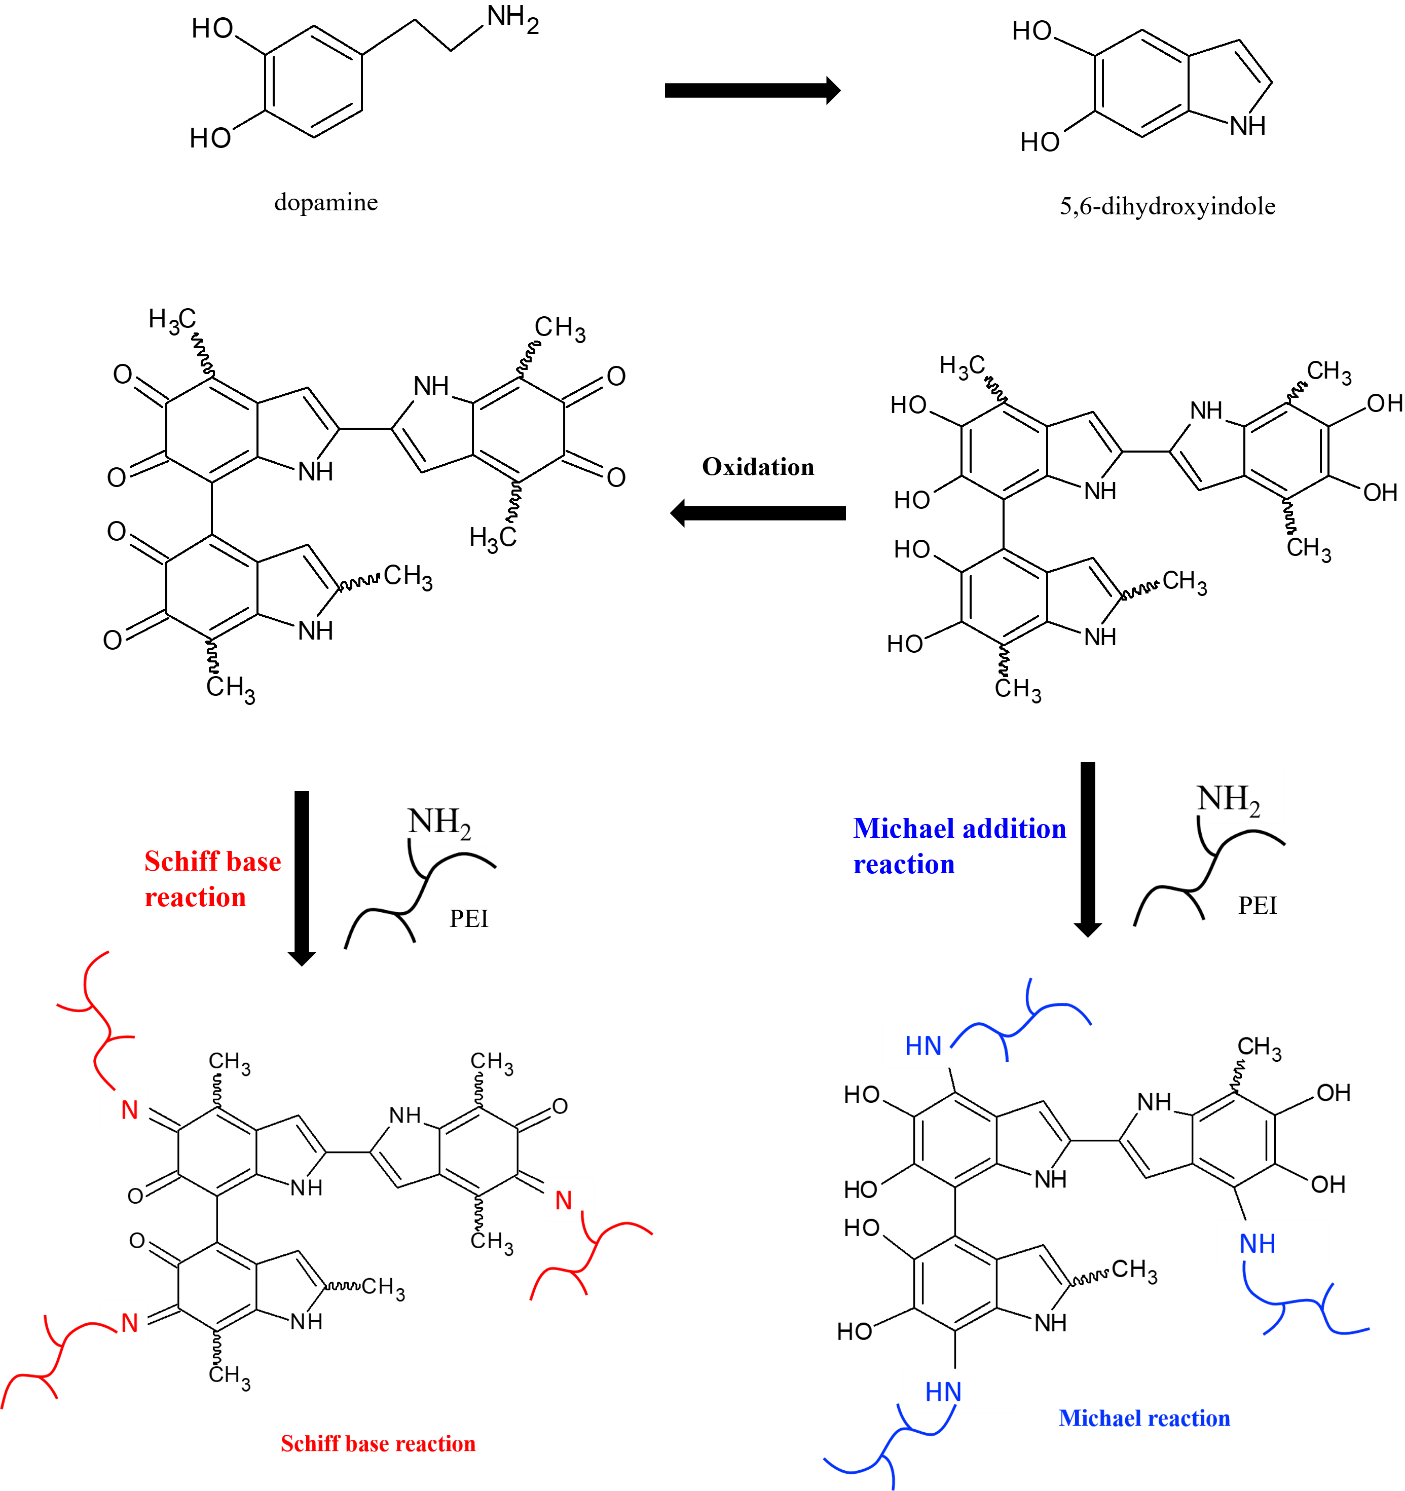


**Figure S6.** Illustration of the two possible reaction mechanisms showing the formation of PDA-PEI carbon crosslinks.


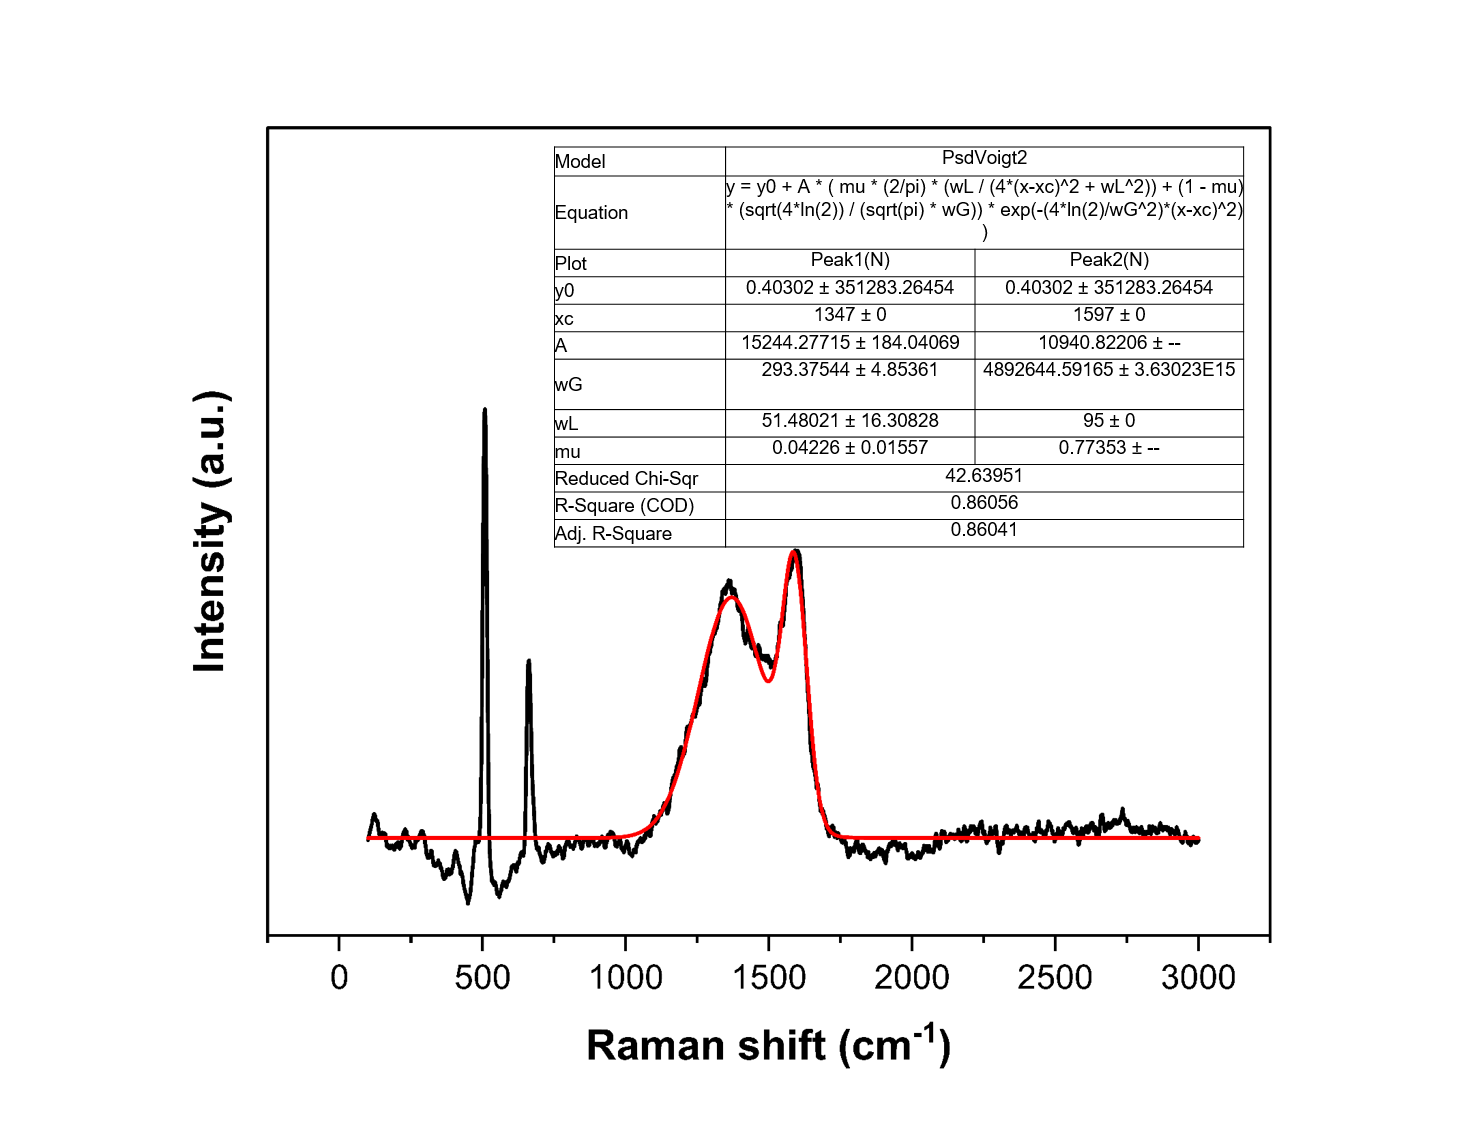


**Figure S7.** Raman peak fitting of core shell PDA@SiO2@Si composite sample.


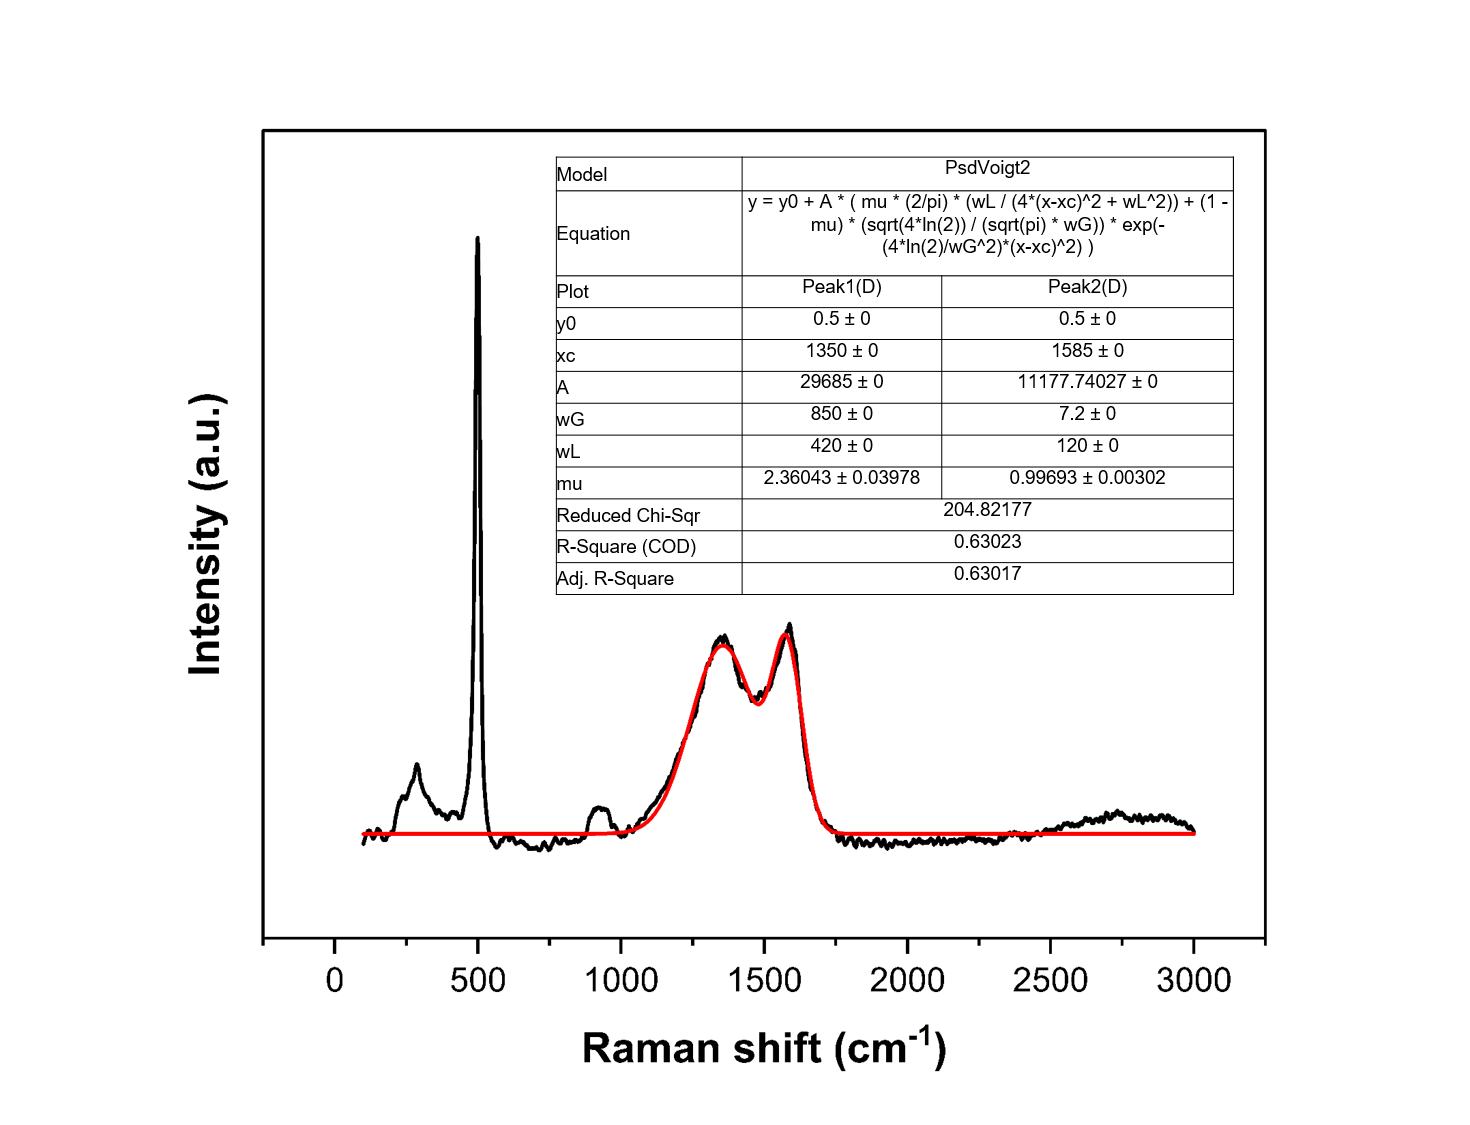


**Figure S8.** Raman peak fitting of yolk shell PDA-PEI@SiO2@Si composite sample.


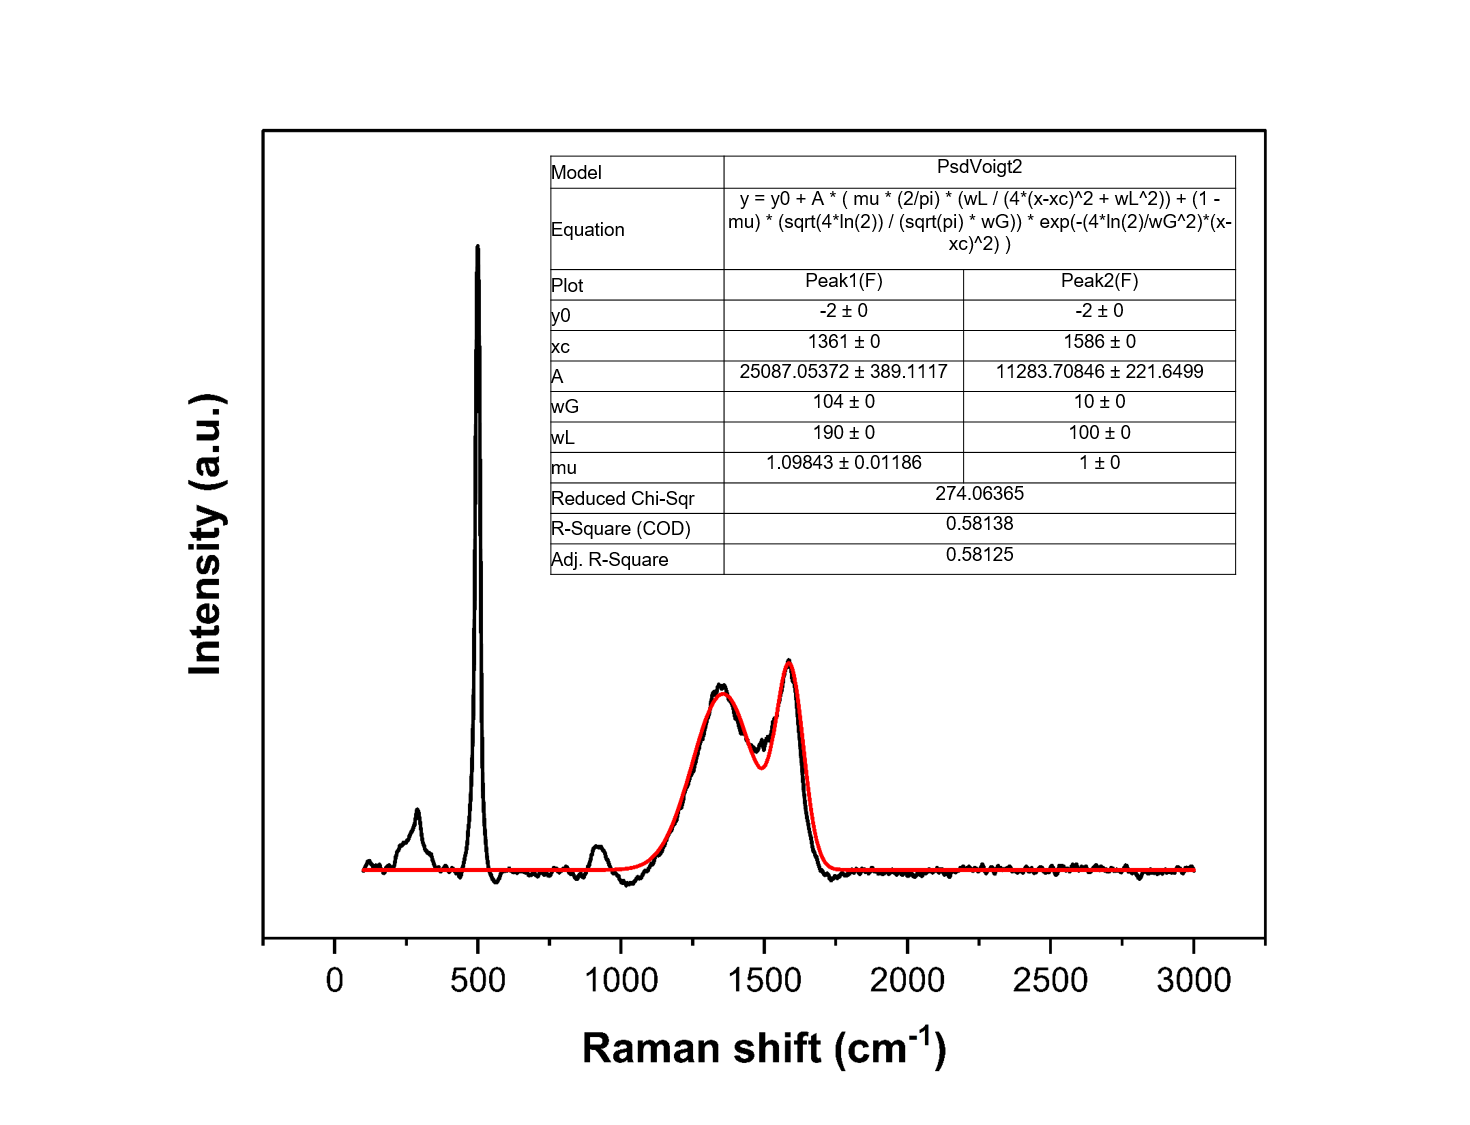


**Figure S9.** Raman peak fitting of yolk shell PDA-PEI@PVP-SiO2@Si composite sample.


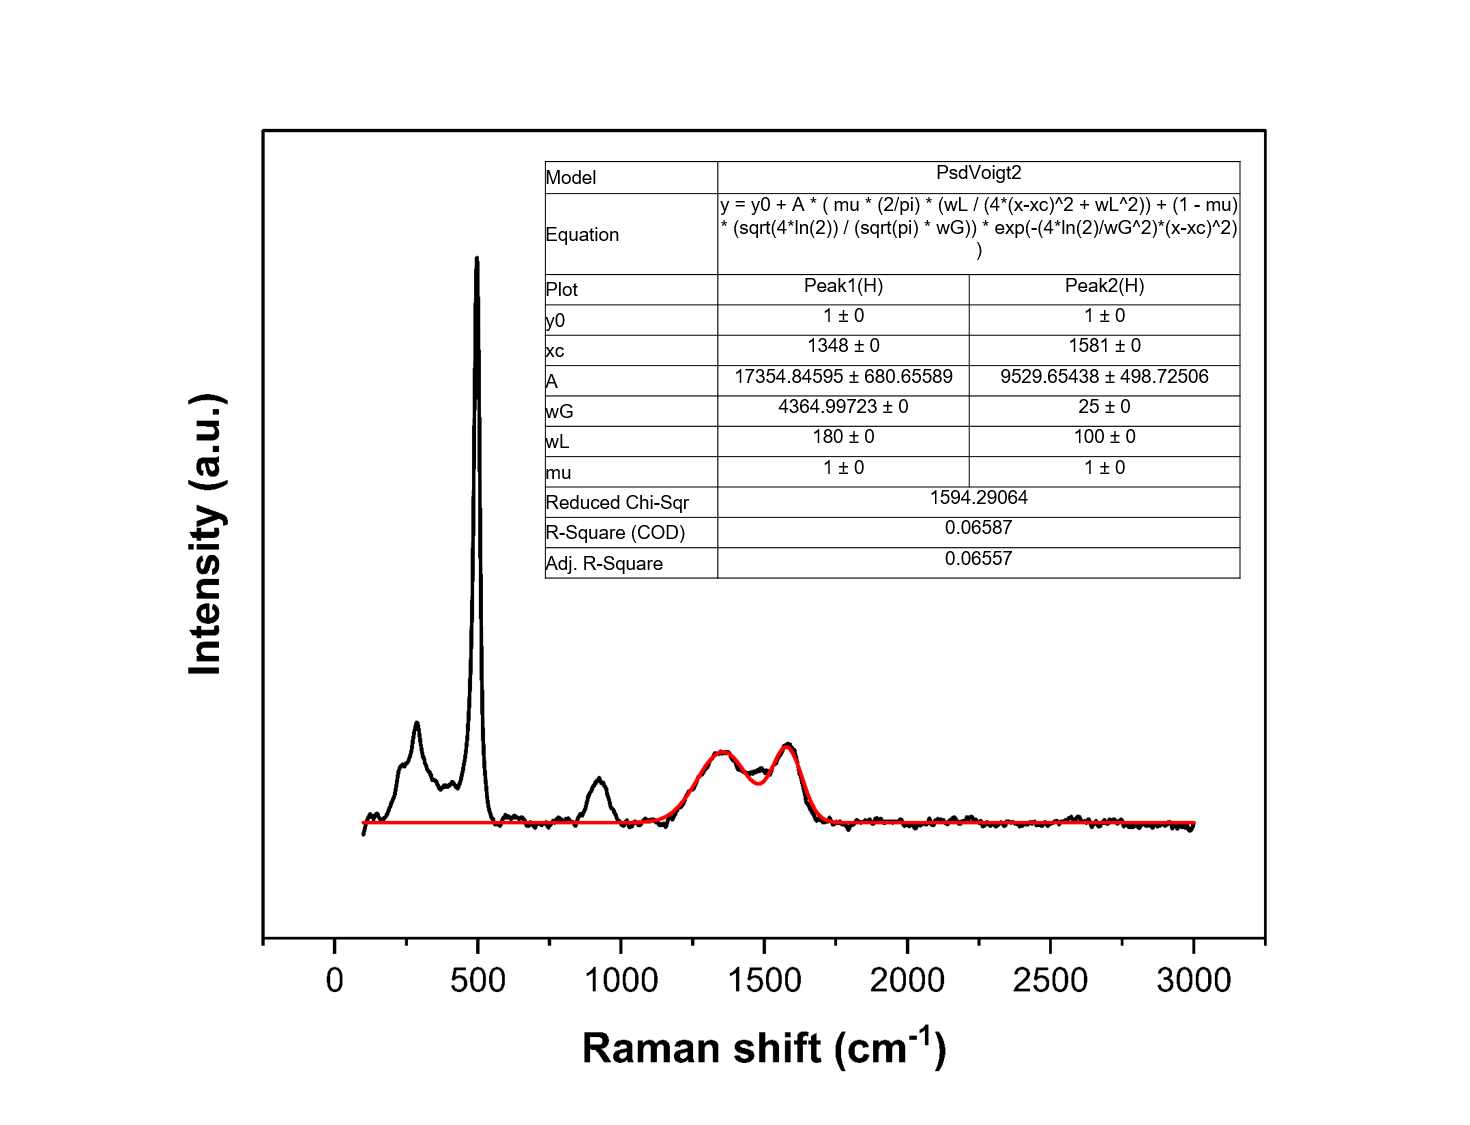


**Figure S10.** Raman peak fitting of core shell PDA-PEI@SiO2@Si composite sample.


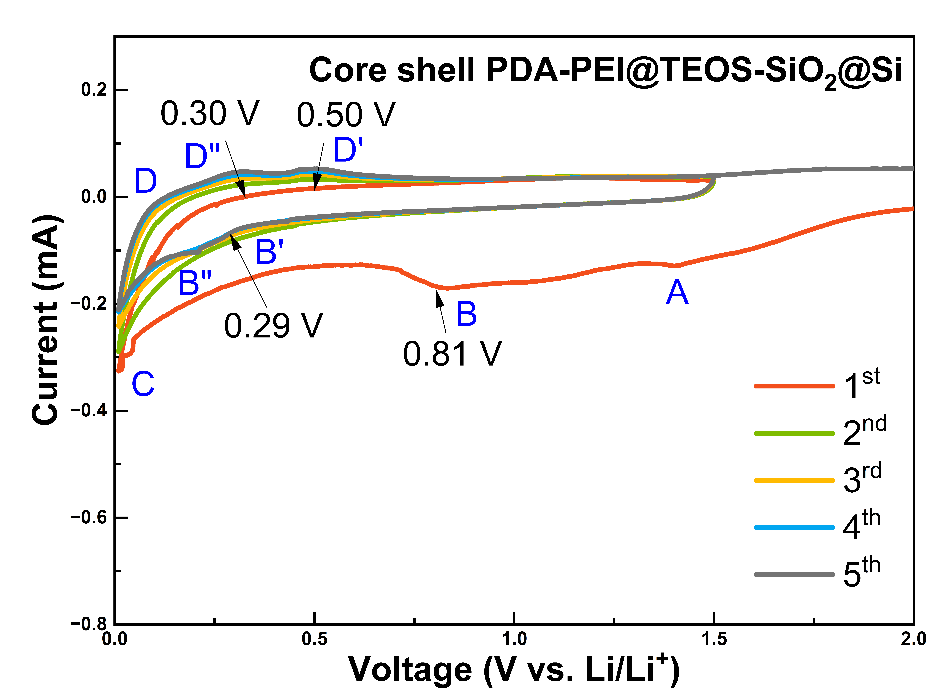


**Figure S11.** CV scans of core shell PDA-PEI@TEOS-SiO2@Si composite fabricated via RT using TEOS as precursor solution.


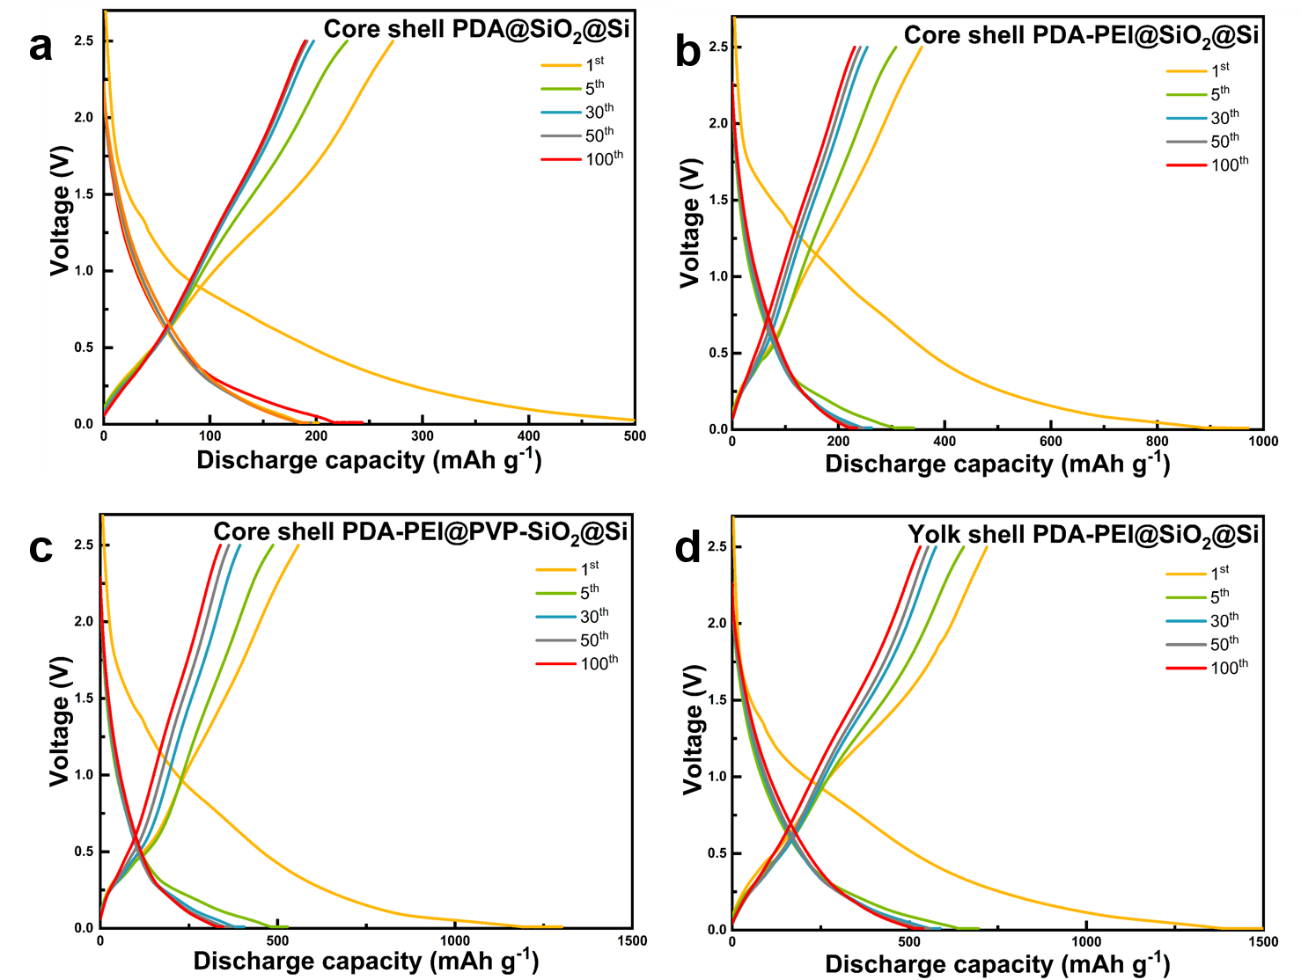


**Figure S12.** Galvanostic charge and discharge profiles of core shell PDA@SiO2@Si (a), core shell PDA-PEI@SiO2@Si (b), core shell PDA-PEI@PVP-SiO2@Si (c), and yolk shell PDA-PEI@SiO2@Si (d) composite samples.

**Table S1**. The ID/IG values of the samples calculated by the ratio of the D band peak area to the G band peak area using Gaussian-Lorentzian curve fitting model.

| **Sample** | **D band** | | | **G band** | | | **ID/IG** |
| --- | --- | --- | --- | --- | --- | --- | --- |
| **A** | **I** | **FWHM** | **A** | **I** | **FWHM** |
| Core shell PDA@SiO2@Si | 15244.277 | 1347.0 | 51.480 | 10940.822 | 1597.0 | 95.0 | 0.84 |
| Yolk shell PDA-PEI@SiO2@Si | 29685.0 | 1350.0 | 420.0 | 11177.740 | 1585.0 | 120.0 | 0.85 |
| Yolk shell PDA-PEI@PVP-SiO2@Si | 25087.054 | 1361.0 | 190.0 | 11283.708 | 1586.0 | 100.0 | 0.86 |
| Core shell PDA-PEI@SiO2@Si | 17354.846 | 1348.0 | 180.0 | 9529.654 | 1581.0 | 100.0 | 0.85 |
